# Supplementary material
Source: publisher figshare collection journal article supplement (https://sage.figshare.com/ndownloader/files/18057716)

## STROKE PATIENTS' EXPERIENCES IN THE AHR

### Supplementary File 2.

*Standard private room at Toronto Rehabilitation Institute (TRI) - view of wall from bed*

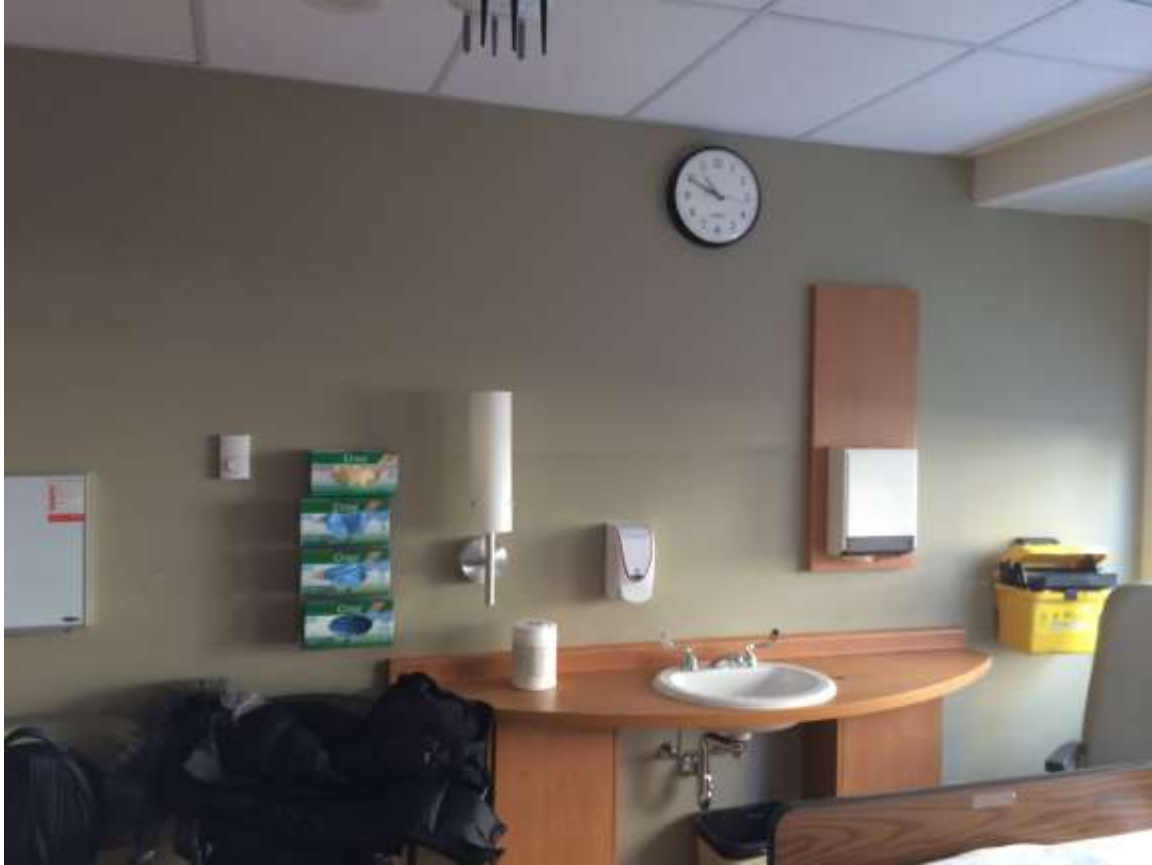

Supplement: Supplementary file 1 [file 18057716]
